# Supplementary material for: Rates of cortical thinning in Alzheimer’s disease signature regions associate with vascular burden but not with β-amyloid status in cognitively normal adults at age 70
Source: PubMed Central journal article supplement (PMC11287522; doi:10.1136/jnnp-2023-332067), 2024-01-10
Supplement: jnnp-2023-332067supp001.pdf [file jnnp-2023-332067supp001.pdf]

**Supplementary eTable 1.** Associations of baseline  $\beta$ -amyloid deposition and baseline white matter hyperintensity volume with subsequent rates of change in cortical thickness in Alzheimer's disease signature regions in cognitively normal participants.

| Predictor of interest                                                            | Difference in rate of change in cortical thickness in %/year (95% CI) |                        |
|----------------------------------------------------------------------------------|-----------------------------------------------------------------------|------------------------|
|                                                                                  | ADsig Harvard                                                         | ADsig Mayo             |
| A $\beta$ status (positive versus negative)                                      | 0.06 (-0.09, 0.20)                                                    | -0.04 (-0.20, 0.12)    |
| A $\beta$ status (positive versus negative), adjusted for WMHV                   | 0.06 (-0.08, 0.21)                                                    | -0.04 (-0.20, 0.13)    |
| Global A $\beta$ SUVR (per 0.1 increment)                                        | 0.01 (-0.07, 0.09)                                                    | -0.05 (-0.14, 0.04)    |
| Global A $\beta$ SUVR (per 0.1 increment), adjusted for WMHV                     | 0.02 (-0.05, 0.10)                                                    | -0.04 (-0.12, 0.05)    |
| WMHV (per 10mL increment)                                                        | -0.15 (-0.25, -0.04) **                                               | -0.15 (-0.26, -0.03) * |
| WMHV (per 10mL increment), adjusted for TIV                                      | -0.15 (-0.25, -0.04) **                                               | -0.14 (-0.26, -0.03) * |
| WMHV (per 10mL increment), adjusted for A $\beta$ status                         | -0.15 (-0.25, -0.05) **                                               | -0.15 (-0.26, -0.03) * |
| WMHV (per 10mL increment), adjusted for A $\beta$ SUVR                           | -0.15 (-0.25, -0.05) **                                               | -0.14 (-0.26, -0.03) * |
| WMHV (per 10mL increment), adjusted for rate of change in whole cortex thickness | -0.01 (-0.04, 0.02)                                                   | -0.03 (-0.10, 0.05)    |

Coefficients and 95% confidence intervals are from linear regression models adjusted for sex and age at baseline scan. A $\beta$  =  $\beta$ -amyloid; SUVR = standardised uptake value ratio; WMHV = white matter hyperintensity volume; TIV = total intracranial volume. \*  $p \leq 0.05$ ; \*\*  $p \leq 0.01$ . ADsig Harvard consisted of entorhinal, inferior temporal, parahippocampal, temporal pole, precuneus, supramarginal, superior and inferior parietal, superior frontal, pars opercularis, pars triangularis and pars orbitalis areas.<sup>1</sup> ADsig Mayo was comprised of middle temporal, inferior temporal, entorhinal and fusiform areas.<sup>2</sup>

**Supplementary eTable 2.** Associations of baseline regional (lobar)  $\beta$ -amyloid standardised uptake value ratios with subsequent rates of change in cortical thickness in Alzheimer's disease signature regions in cognitively normal participants.

| SUVR region | Difference in rate of change in cortical thickness in %/year per 0.1 increment in baseline A $\beta$ SUVR (95% CI) |                     |
|-------------|--------------------------------------------------------------------------------------------------------------------|---------------------|
|             | ADsig Harvard                                                                                                      | ADsig Mayo          |
| Frontal     | 0.00 (-0.08, 0.09)                                                                                                 | -0.07 (-0.16, 0.02) |
| Parietal    | -0.00 (-0.09, 0.08)                                                                                                | -0.07 (-0.17, 0.02) |
| Temporal    | 0.00 (-0.09, 0.10)                                                                                                 | -0.06 (-0.16, 0.05) |
| Occipital   | -0.01 (-0.10, 0.08)                                                                                                | -0.06 (-0.16, 0.03) |

Note that regional SUVR data was available for 316 out of 337 participants. Coefficients and 95% confidence intervals are from linear regression models adjusted for sex and age at baseline scan. A $\beta$  =  $\beta$ -amyloid; SUVR = standardised uptake value ratio. ADsig Harvard consisted of entorhinal, inferior temporal, parahippocampal, temporal pole, precuneus, supramarginal, superior and inferior parietal, superior frontal, pars opercularis, pars triangularis and pars orbitalis areas.<sup>1</sup> ADsig Mayo was comprised of middle temporal, inferior temporal, entorhinal and fusiform areas.<sup>2</sup>

**Supplementary eTable 3.** Associations of baseline global  $\beta$ -amyloid standardised uptake value ratios with subsequent rates of change in cortical thickness in Alzheimer's disease signature regions in cognitively normal participants, allowing for differing slopes in  $\beta$ -amyloid positive and negative participants.

|                                             | Difference in rate of change in cortical thickness in %/year per 0.1 increment in baseline global A $\beta$ SUVR (95% CI) |                     |
|---------------------------------------------|---------------------------------------------------------------------------------------------------------------------------|---------------------|
|                                             | ADsig Harvard                                                                                                             | ADsig Mayo          |
| <b>A<math>\beta</math> positive (n=56)</b>  | 0.03 (-0.14, 0.20)                                                                                                        | -0.17 (-0.36, 0.02) |
| <b>A<math>\beta</math> negative (n=281)</b> | -0.00 (-0.16, 0.15)                                                                                                       | 0.06 (-0.11, 0.22)  |

Coefficients and 95% confidence intervals are from a piecemeal linear spline regression model (with a knot value set to the SUVR cut point for A $\beta$  positivity, 0.6104) adjusted for sex and age at baseline scan. A $\beta$  =  $\beta$ -amyloid; SUVR = standardised uptake value ratio. ADsig Harvard consisted of entorhinal, inferior temporal, parahippocampal, temporal pole, precuneus, supramarginal, superior and inferior parietal, superior frontal, pars opercularis, pars triangularis and pars orbitalis areas.<sup>1</sup> ADsig Mayo was comprised of middle temporal, inferior temporal, entorhinal and fusiform areas.<sup>2</sup>

## References

1. Dickerson BC, Bakkour A, Salat DH, et al. The cortical signature of Alzheimer's disease: Regionally specific cortical thinning relates to symptom severity in very mild to mild AD dementia and is detectable in asymptomatic amyloid-positive individuals. *Cereb Cortex*. 2009;19(3):497-510. doi:10.1093/cercor/bhn113
2. Jack CR, Wiste HJ, Weigand SD, et al. Different definitions of neurodegeneration produce similar amyloid/neurodegeneration biomarker group findings. *Brain*. 2015;138(12):3747-3759. doi:10.1093/brain/awv283
